# Supplementary material
Source: bioRxiv or medRxiv preprint supplement (https://medrxiv.org/highwire/filestream/98151/field_highwire_adjunct_files/2/2020.09.22.20195628-3.pdf)

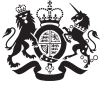

**If you have a cough, or fever, or shortness of breath and have been to any of these places in the last 14 days:**

- China
- Republic of Korea
- Singapore
- Thailand
- Hong Kong
- Malaysia
- Japan
- Taiwan
- Macau

**Stay indoors and call NHS 111**

**If you have been to Wuhan, or Hubei Province, China in the last 14 days ...**

**Stay indoors and contact NHS 111**  
even if you do not have symptoms

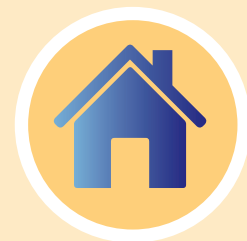

Supplement: Supplementary file [file 2020.09.22.20195628-3.pdf]
